# Supplementary material for: The Combined Effects of Varroa destructor Parasitism and Exposure to Neonicotinoids Affects Honey Bee (Apis mellifera L.) Memory and Gene Expression
Source: PubMed Central journal article supplement (PMC7565275; doi:10.3390/biology9090237), 2020-08-20
Supplement: biology-09-00237-s001.pdf [file biology-09-00237-s001.pdf]

**Table S1.** Number of bees positive and negative to the PER assay at 2, 24 and 48 h post training.

| <b>Treatment</b>                                         | <b>2 h</b>      |                 | <b>24 h</b>     |                 | <b>48 h</b>     |                 |
|----------------------------------------------------------|-----------------|-----------------|-----------------|-----------------|-----------------|-----------------|
|                                                          | <b>Positive</b> | <b>Negative</b> | <b>Positive</b> | <b>Negative</b> | <b>Positive</b> | <b>Negative</b> |
| 0 ng / $\mu$ l                                           | 187             | 84              | 161             | 110             | 90              | 181             |
| $9 \times 10^{-4}$ ng / $\mu$ l                          | 67              | 125             | 60              | 132             | 45              | 147             |
| $4.2 \times 10^{-3}$ ng / $\mu$ l                        | 51              | 123             | 40              | 134             | 28              | 146             |
| $1 \times 10^{-2}$ ng / $\mu$ l                          | 24              | 63              | 10              | 77              | 10              | 77              |
| 0 ng / $\mu$ l + <i>V. destructor</i>                    | 22              | 18              | 12              | 28              | 7               | 33              |
| $9 \times 10^{-4}$ ng / $\mu$ l + <i>V. destructor</i>   | 9               | 31              | 7               | 33              | 5               | 35              |
| $4.2 \times 10^{-3}$ ng / $\mu$ l + <i>V. destructor</i> | 4               | 15              | 1               | 18              | 2               | 17              |
| $1 \times 10^{-2}$ ng / $\mu$ l + <i>V. destructor</i>   | 9               | 32              | 5               | 36              | 3               | 38              |
